# Supplementary material for: High-Efficiency Extraction of Pantoea alhagi Exopolysaccharides Driven by pH-Related Changes in the Envelope Structure
Source: MDPI journal article supplement (doi:10.3390/molecules27217209), 2022-10-25
Supplement: s1 [file s1]

**High-efficiency extraction of *Pantoea alhagi* exopolysaccharides driven by  
pH-related changes in the envelope structure**

**Yuhang Ma<sup>1,†</sup>, Liang Sun<sup>1,†</sup>, Rui Wang<sup>1</sup>, Yian Gu<sup>1</sup>, Hong Xu<sup>1,\*</sup>, Peng Lei<sup>1\*</sup>**

<sup>1</sup> State Key Laboratory of Materials-Oriented Chemical Engineering, College of Food Science and Light Industry, Nanjing Tech University, Nanjing 211816, China

**\*Corresponding author**

Hong Xu; Nanjing Tech University; Tel/Fax: +86-25-58139433; E-mail address:  
xuh@njtech.edu.cn;

Peng Lei; Nanjing Tech University; Tel/Fax: +86-25-58139433; E-mail address:  
lei-peng@njtech.edu.cn;

<sup>†</sup> These authors contributed equally to this work.

The following are Supplementary information to this article :

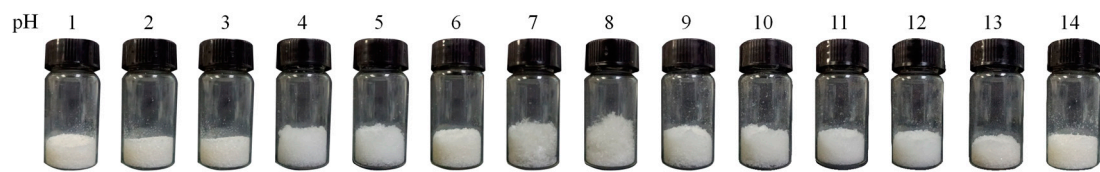

**Figure S1.** Dried PAPS obtained by different treatments.

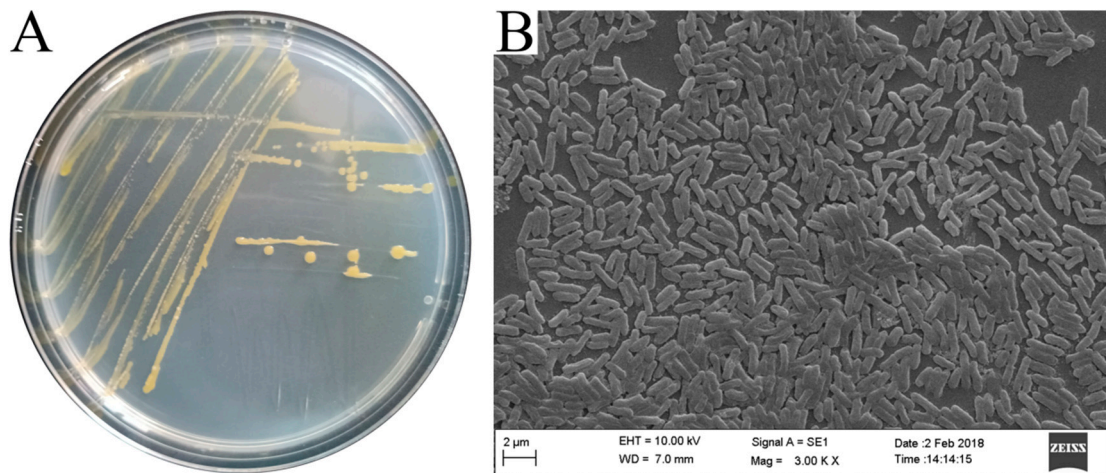

**Figure S2** Morphological characterization of *Pantoea alhagi* NX-11(A) Colony morphology of NX-11. (B) Scanning electron micrograph of NX-11 colonies.

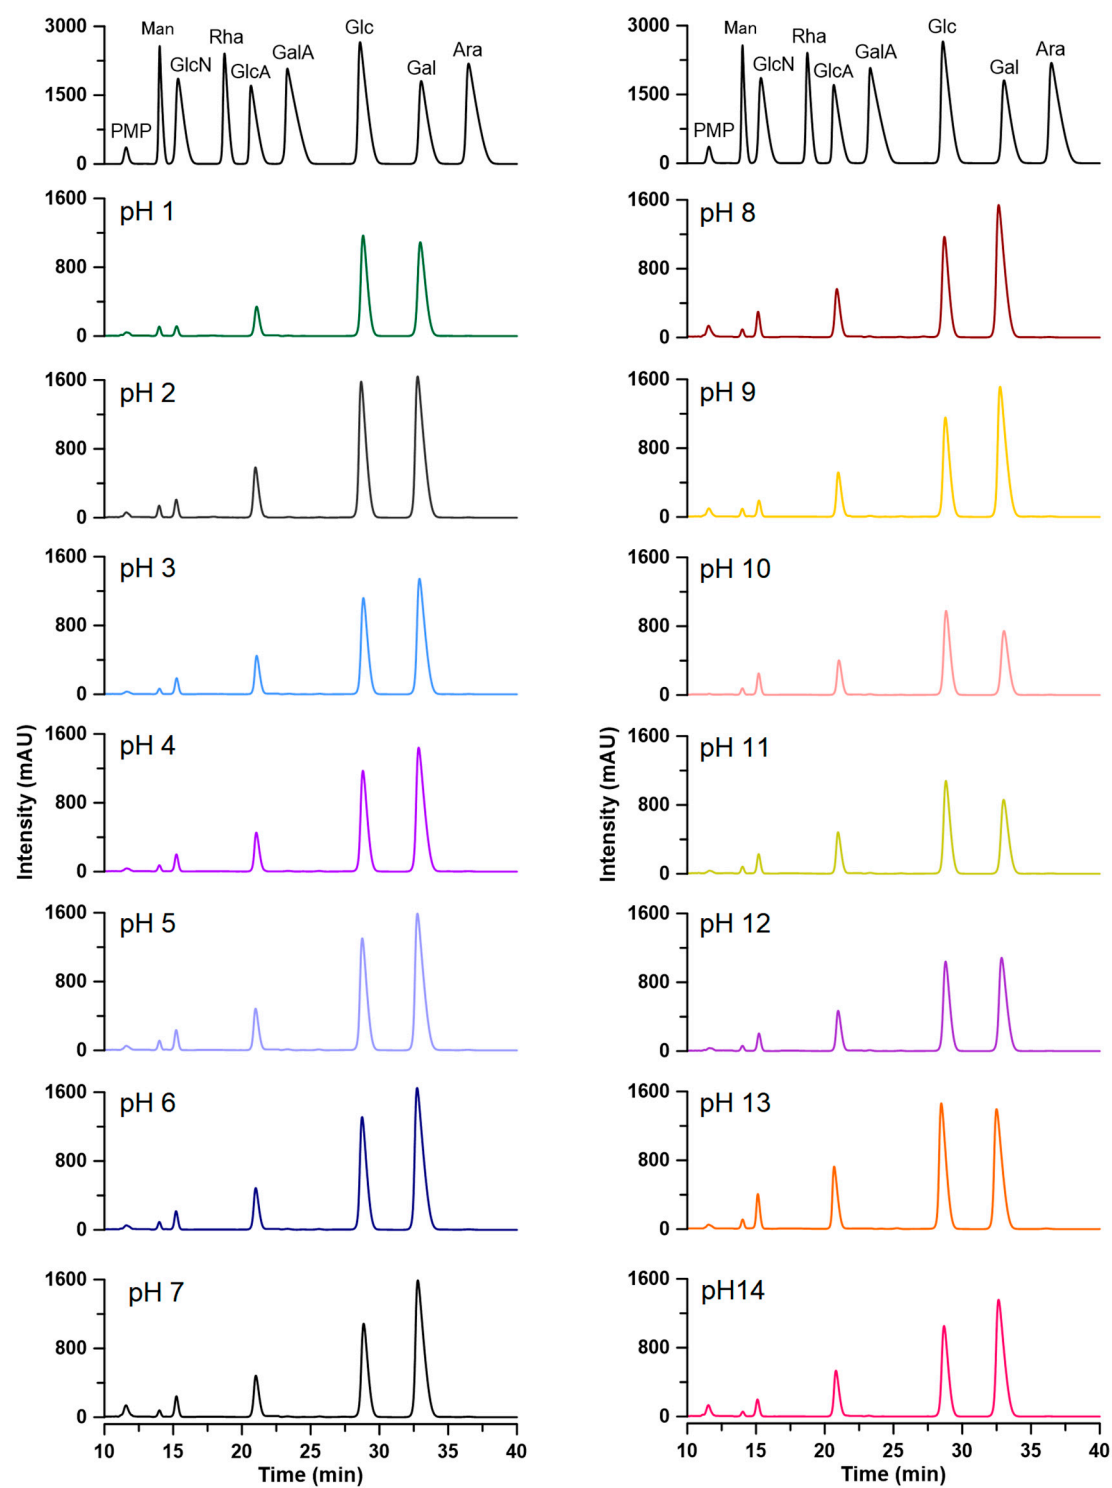

**Figure S3.** Analysis of monosaccharide components of pH 1-14-treated PAPS

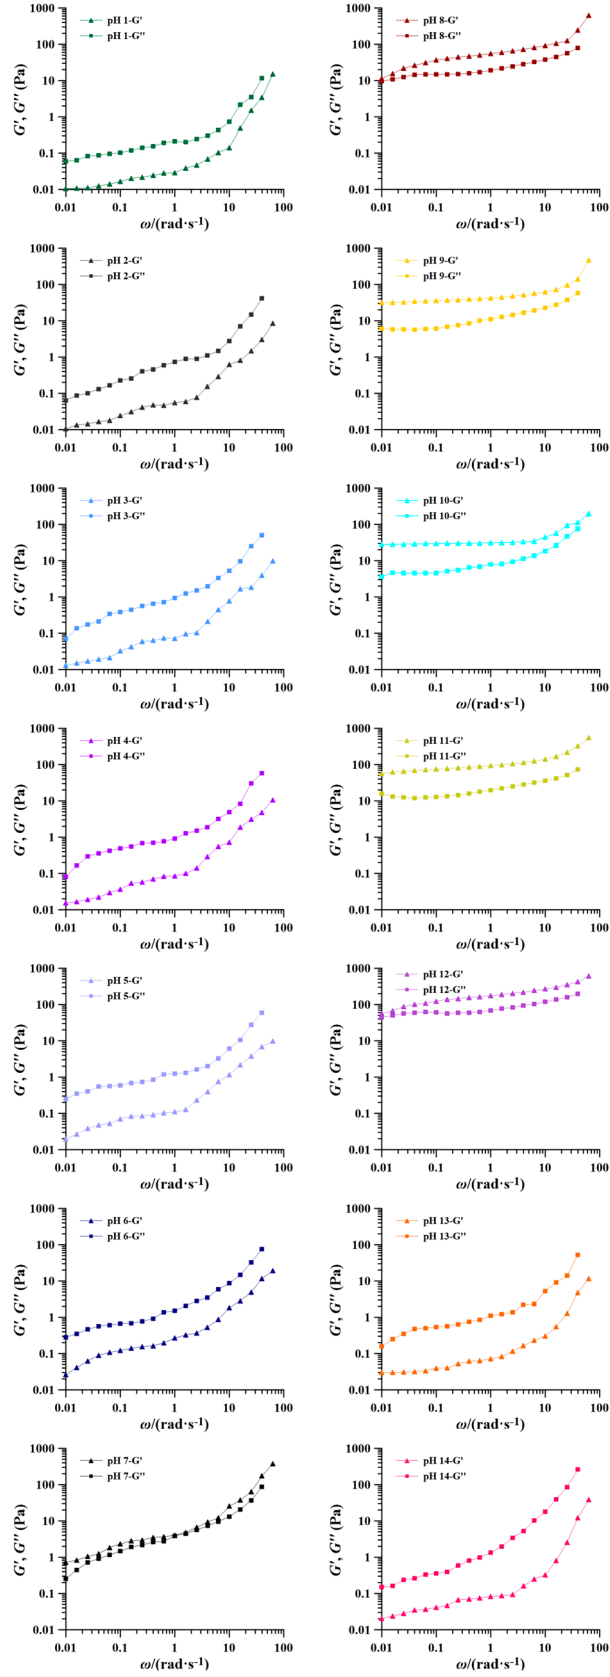

**Figure. S4.** Effect of pH on the storage ( $G'$ ) and loss ( $G''$ ) moduli of pH 1-14-treated PAPS.
